# Supplementary material for: Synchrotron microbeam irradiation induces neutrophil infiltration, thrombocyte attachment and selective vascular damage in vivo
Source: PubMed Central journal article supplement (PMC5027521; doi:10.1038/srep33601), 2016-09-19
Supplement: srep33601-s1.pdf [file srep33601-s1.pdf]

## SUPPLEMENTARY INFORMATION

### SYNCHROTRON MICROBEAM IRRADIATION INDUCES NEUTROPHIL INFILTRATION, THROMBOCYTE ATTACHMENT AND SELECTIVE VASCULAR DAMAGE *IN VIVO*

---

*Daniel Brönnimann<sup>1a</sup>, Audrey Bouchet<sup>1a#</sup>, Christoph Schneider<sup>2</sup>, Marine Potez<sup>1</sup>, Raphaël Serduc<sup>3</sup>, Elke Bräuer-Krisch<sup>4</sup>, Werner Graber<sup>1</sup>, Stephan von Gunten<sup>2</sup>, Jean Albert Laissue<sup>1</sup> and Valentin Djonov<sup>\*1</sup>*

---

<sup>1</sup> Institute of Anatomy, Group Topographic and Clinical Anatomy, University of Bern, Baltzerstrasse 2, 3012 Bern, Switzerland

<sup>2</sup> Institute of Pharmacology, University of Bern, Inselspital INO-F, 3010 Bern, Switzerland

<sup>3</sup> Université Grenoble Alpes, EA-Rayonnement Synchrotron et Recherche Medicale, ESRF, ID17 F-38043 Grenoble, France

<sup>4</sup> Biomedical Beamline, European Synchrotron Radiation Facility, BP220, F38043 Grenoble

<sup>a</sup> authors contributed equally to this work.

# current address: Rayonnement Synchrotron et Recherche Médicale, EA 7442, Université Grenoble Alpes, 71 Avenue des Martyrs, 38000 Grenoble, France.

\*Corresponding author: Valentin Djonov, Baltzerstrasse 2, 3012 Bern, Tel. +41 31 631 84 32 ([djonov@ana.unibe.ch](mailto:djonov@ana.unibe.ch))

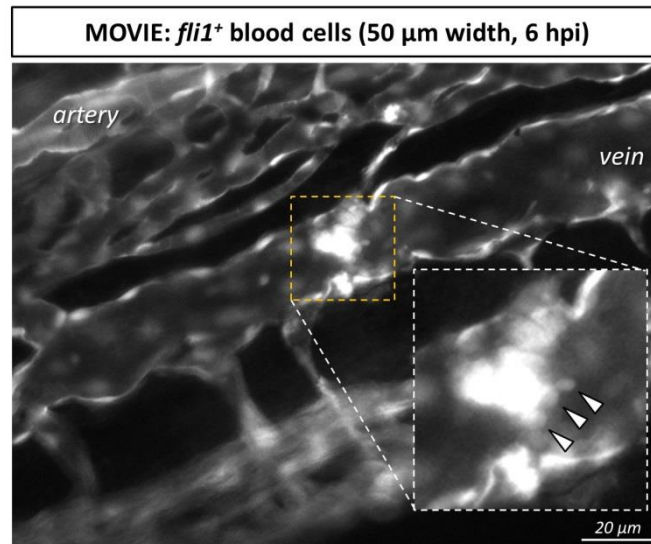

**Supporting information 1. Attaching and detaching *fli1a*<sup>+</sup> thrombocytes in the beam path previously irradiated with one 50  $\mu$ m-wide beam.** Real-time movie of a vein in the immature caudal fin at 6 hpi. *Fli1a*<sup>+</sup> thrombocytes (white arrowheads) continuously attach and detach to the site of irradiation (orange encircled area).

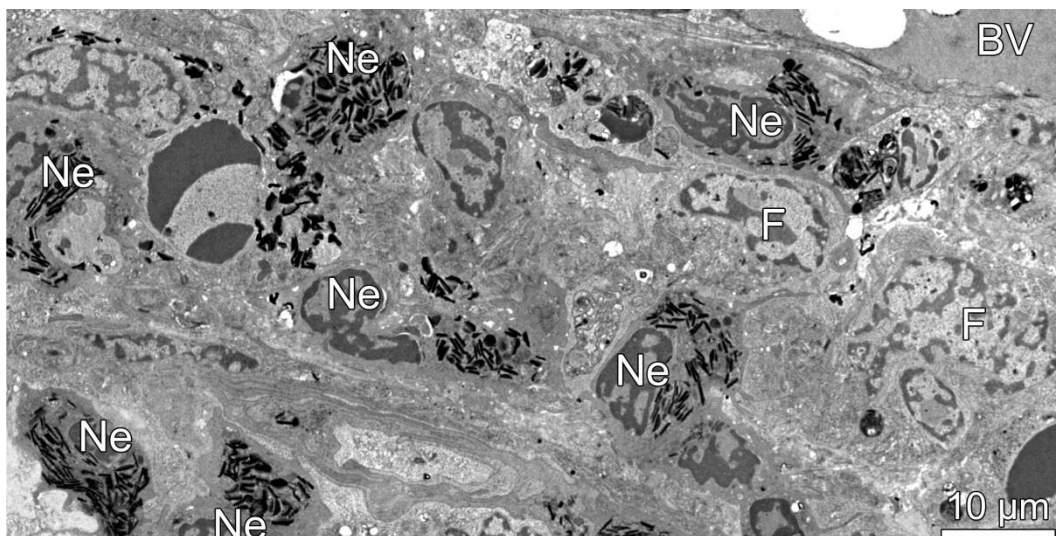

**Supporting information 2. Extravasated and tissue-resident neutrophils (Ne) in the loose connective tissue.** Neutrophils (Ne), fibroblast (F), blood vessel (BV).

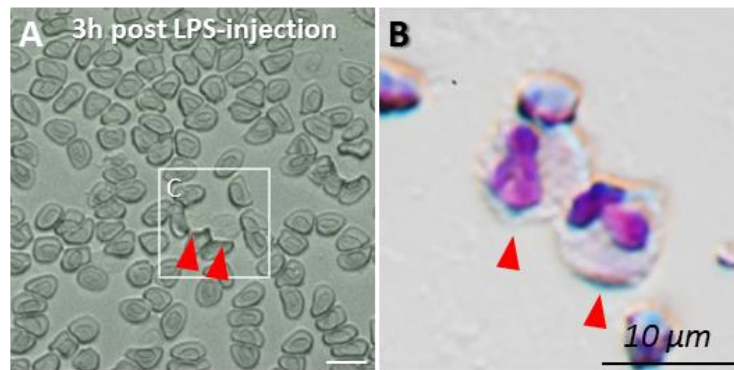

**Supporting information 3. Neutrophils did not express *fli1a*.** (A) Blood smear of zebrafish blood 3h post LPS-injection. (B) Neutrophils (red arrowheads) did not express *fli1a*<sup>+</sup>.

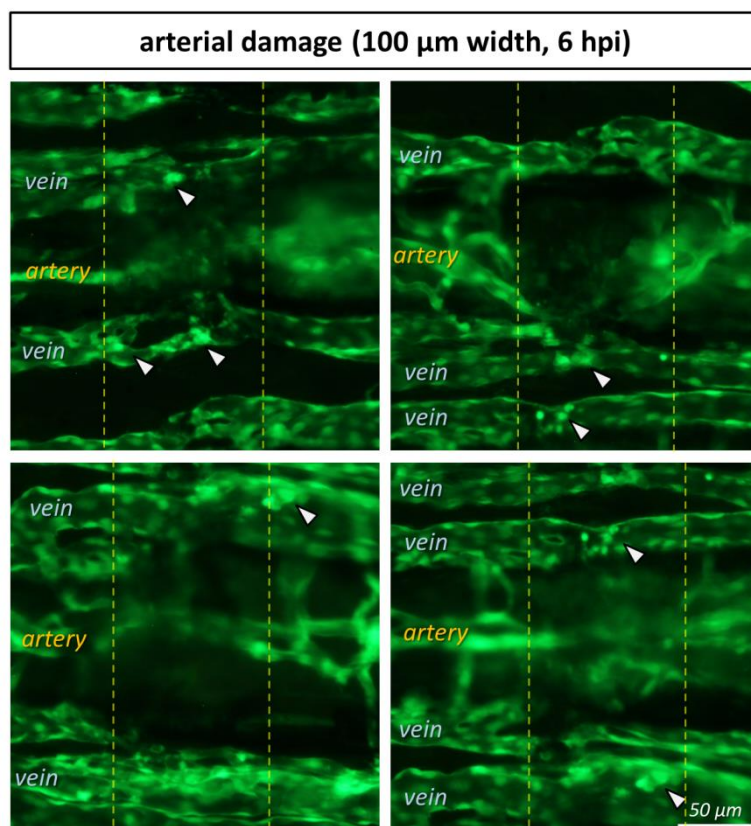

**Supporting information 4. Microbeam IR with 100 μm-wide beams intersects arteries (6 hpi).** Vasculature of fin rays irradiated with a 100 μm-wide beam. The yellow dashed line indicates the site of irradiation. Arteries are disrupted, whereas *fli1a*<sup>+</sup> blood cells (white arrowheads) adhere to the vessel wall in veins sited in the beam path.

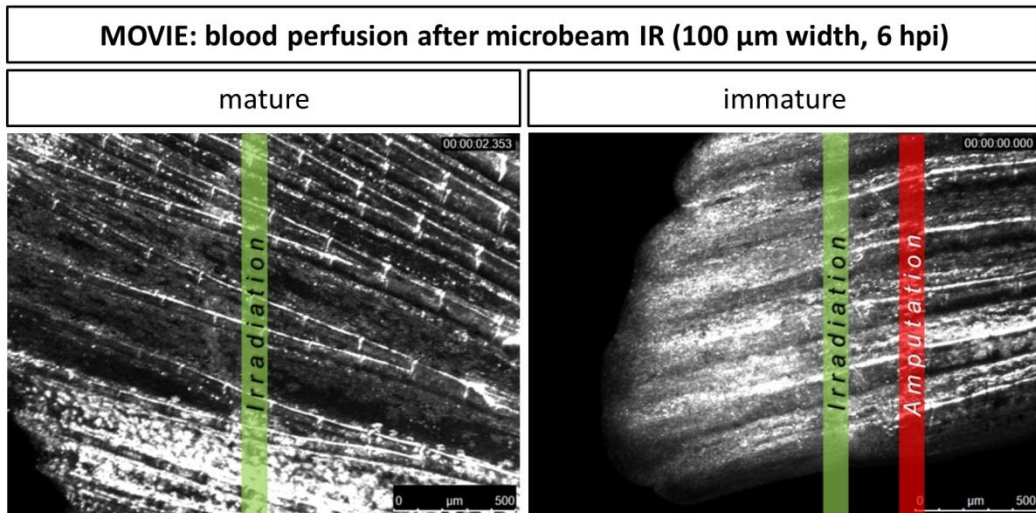

**Supporting information 5. Blood perfusion of the mature and immature fin.** In the mature fin, the blood flows past the irradiation site in both directions. In the immature fin, the blood vessels are discontinued, causing a defective blood perfusion distal to the site of irradiation.

| 6 hpi                          | mature fin |     |     |     |     |     | immature fin |     |     |     |     |     |     |
|--------------------------------|------------|-----|-----|-----|-----|-----|--------------|-----|-----|-----|-----|-----|-----|
|                                | 25         | 50  | 100 | 200 | 400 | 800 | 25           | 50  | 100 | 200 | 400 | 800 |     |
| Beam path visibility           | minor      | yes | yes | yes | yes | yes | yes          | yes | yes | yes | yes | yes | yes |
| Disturbed blood perfusion      | no         | no  | no  | no  | no  | no  | no           | yes | yes | yes | yes | yes | yes |
| Adhesion of <i>fli1+</i> cells | no         | no  | no  | no  | no  | no  | minor        | yes | yes | N/A | N/A | N/A | N/A |
| Tissue damage                  | no         | no  | N/A | no  | N/A | no  | yes          | yes | yes | N/A | yes | N/A | yes |
| Fragmentation damage           | no         | no  | no  | no  | no  | no  | minor        | yes | yes | yes | yes | yes | yes |
| Damage in veins                | no         | no  | no  | no  | no  | no  | yes          | yes | yes | yes | yes | yes | yes |
| Damage in arteries             | no         | no  | no  | no  | no  | no  | no           | no  | yes | yes | yes | yes | yes |

| 48+ hpi                    | mature fin |       |       |       |       |     | immature fin |       |       |       |     |     |     |
|----------------------------|------------|-------|-------|-------|-------|-----|--------------|-------|-------|-------|-----|-----|-----|
|                            | 25         | 50    | 100   | 200   | 400   | 800 | 25           | 50    | 100   | 200   | 400 | 800 |     |
| Beam path visibility       | no         | minor | minor | minor | minor | yes | no           | no    | no    | no    | yes | yes | yes |
| Disturbed blood perfusion  | no         | no    | no    | no    | yes   | yes | no           | no    | minor | minor | yes | yes | yes |
| Damage in beam path        | no         | no    | no    | no    | yes   | yes | no           | no    | no    | no    | yes | yes | yes |
| Damage distal to beam path | no         | minor | minor | no    | yes   | yes | no           | minor | minor | yes   | yes | yes | yes |

**Supporting information 6. Table summarizing the occurrence of the effects *in vivo*.** (1) Beam path visibility: Whether or not the path was visible as a burnt-in line on the tissue. (2) Disturbed blood perfusion: Whether or not endothelial cell damage limited blood perfusion in the fin rays. (3) Adhesion of *fli1a+* cells: Whether or not *fli1a+* cells adhered to the endothelium within the beam path. (4) Tissue damage: Whether or not the surrounding tissue was visibly harmed; transmission electron microscopy findings. (5) Fragmentation damage: Whether or not the endothelial cells were characterized by dense fluorescent spots, possibly indicating membrane damage. (6) Damage in veins: Were venous vessels damaged? (7) Damage in arteries: Were arterial vessels damaged? (8) Damage in beam path: Whether or not the damage was restricted to the beam path. (9) Damage distal to the beam path: Whether or not the tissue distal to the beam path was visibly harmed (e.g. through prolonged lack of perfusion).

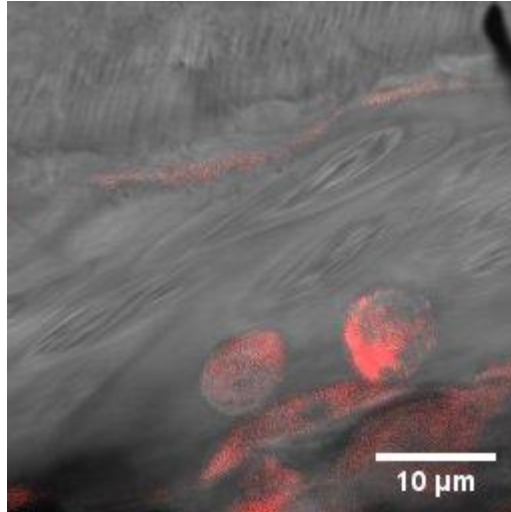

**Supporting information 7. Movie of CD41<sup>+</sup>/*fli1α*<sup>-</sup> blood cells rolling on endothelium in 5 dpf old fish.**



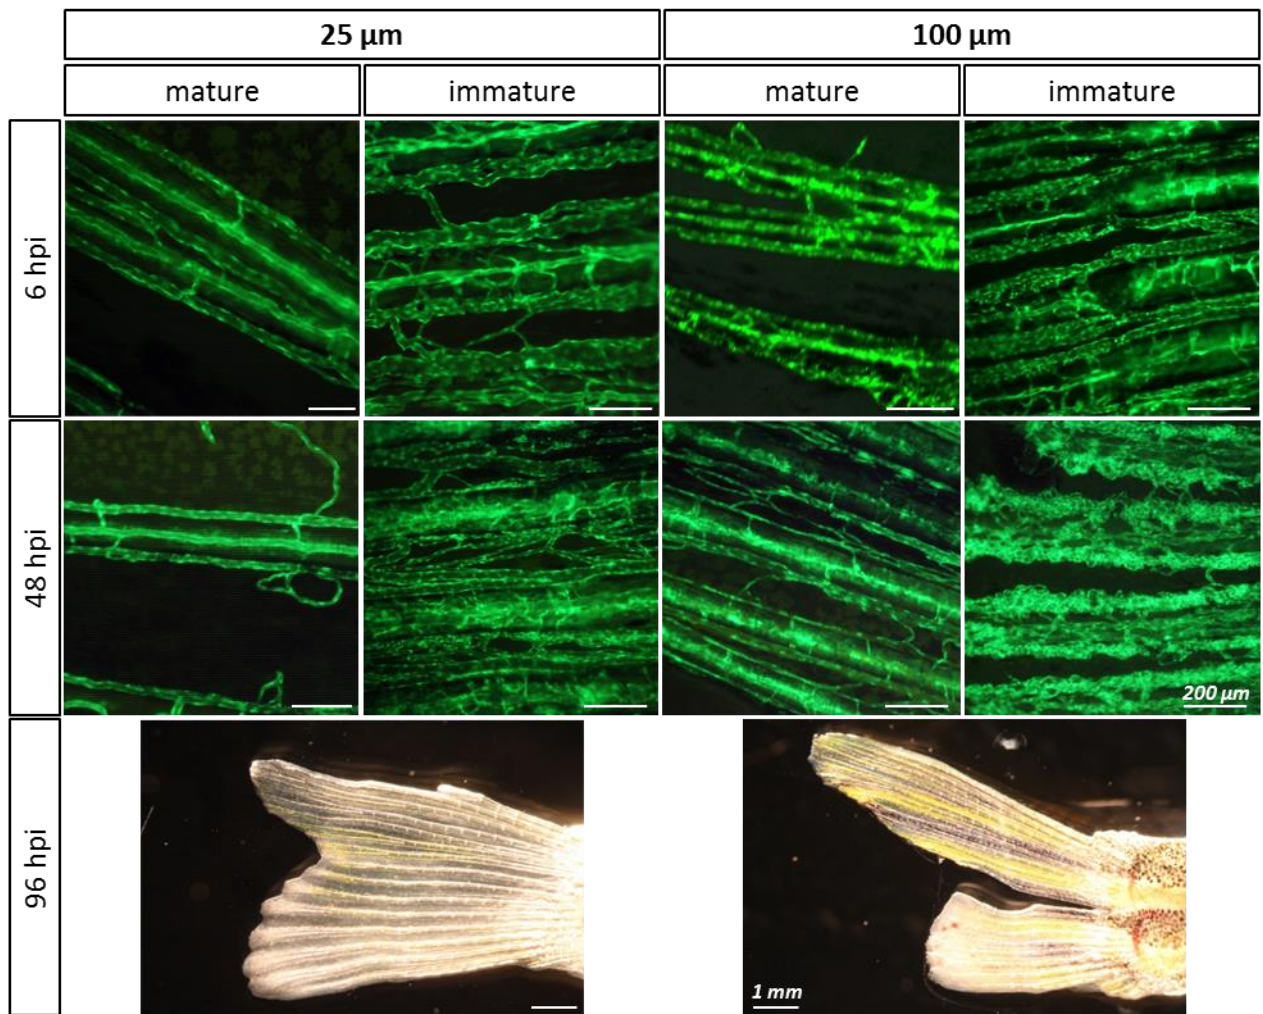

**Supporting information 8. Effects of microbeam (25, 100  $\mu\text{m}$ ) irradiation on the mature and immature vasculature at 6, 48, and 96 hpi.**

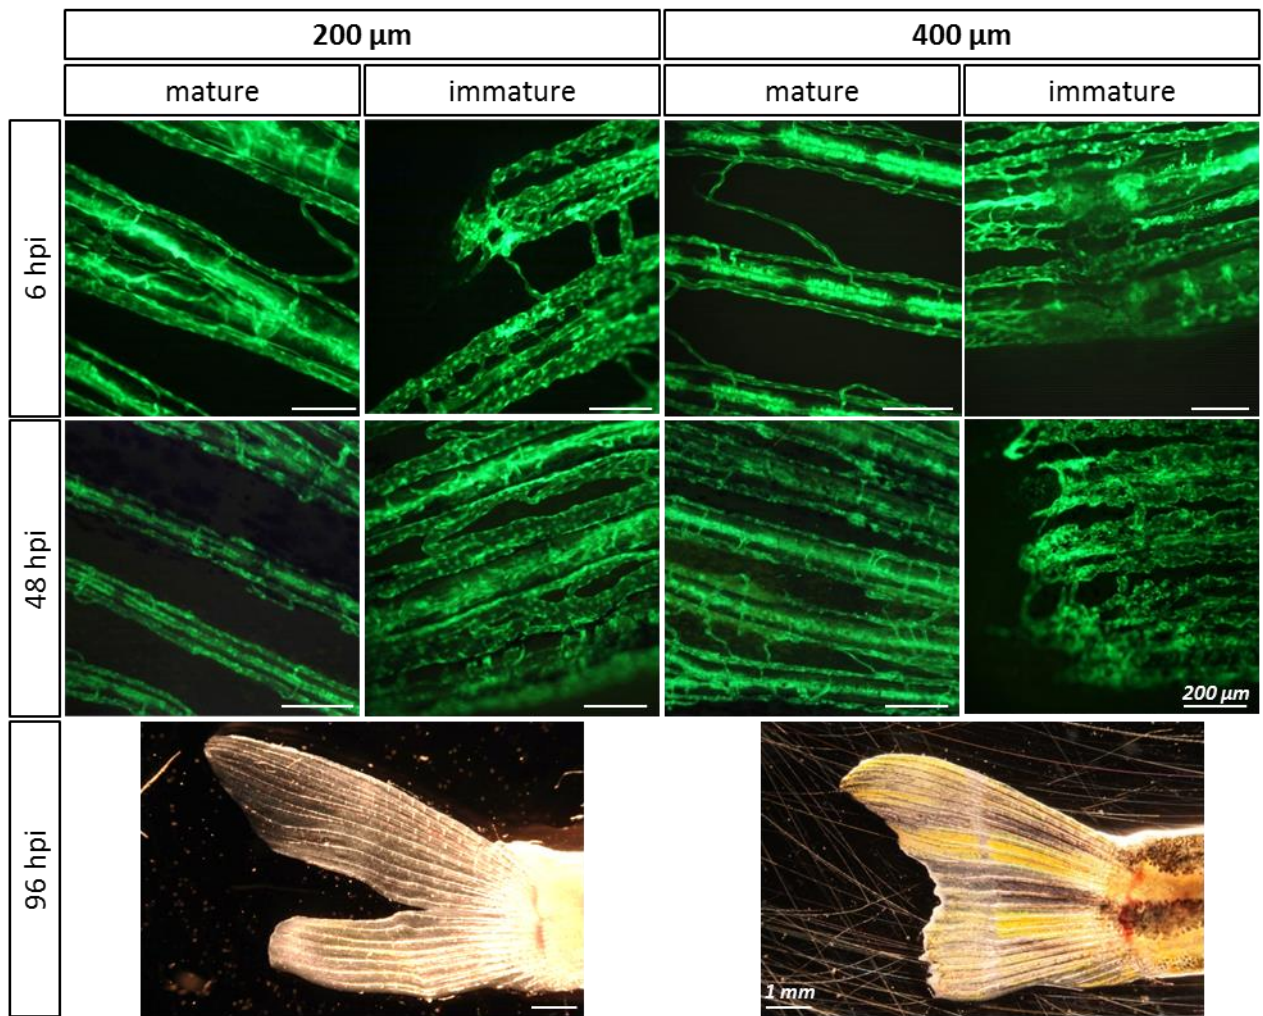

**Supporting information 9. Effects of microbeam (200, 400  $\mu\text{m}$ ) irradiation on the mature and immature vasculature at 6, 48, and 96 hpi.**
